# Supplementary material for: Inhibition of cell survival and invasion by Tanshinone IIA via FTH1: A key therapeutic target and biomarker in head and neck squamous cell carcinoma
Source: PubMed Central journal article supplement — Exp Ther Med. 2022 Jun 16;24(2):521. doi: 10.3892/etm.2022.11449 (PMC9257971; doi:10.3892/etm.2022.11449), 2022-06-16
Supplement: Supplementary_Data4.pdf [file Supplementary_Data4.pdf]

Table SIV. Clinical characteristics of samples from The Cancer Genome Atlas.

| Characteristic |                 | Number |
|----------------|-----------------|--------|
| Status         | Alive           | 286    |
|                | Dead            | 218    |
| Age            | Mean, years     | 61     |
|                | Median, years   | 61     |
| Sex            | Female          | 134    |
|                | Male            | 370    |
| Race           | Native American | 2      |
|                | Asian           | 10     |
|                | Black           | 47     |
|                | White           | 430    |
| Tstage         | T1              | 34     |
|                | T2              | 146    |
|                | T3              | 133    |
|                | T4              | 25     |
|                | T4a             | 152    |
|                | T4b             | 3      |
|                | TX              | 11     |
| Nstage         | N0              | 242    |
|                | N1              | 81     |
|                | N2              | 19     |
|                | N2a             | 18     |
|                | N2b             | 77     |
|                | N2c             | 41     |
|                | N3              | 7      |
|                | NX              | 19     |
| Mstage         | M0              | 479    |
|                | M1              | 5      |
|                | MX              | 20     |
| TNMstage       | I               | 25     |
|                | II              | 81     |
|                | III             | 91     |
|                | IVA             | 291    |
|                | IVB             | 13     |
|                | IVC             | 3      |
| Grade          | G1              | 62     |
|                | G2              | 301    |

|                                  |                                                   |     |
|----------------------------------|---------------------------------------------------|-----|
|                                  | G3                                                | 119 |
|                                  | G4                                                | 2   |
|                                  | GX                                                | 17  |
| Newtumor event type              | Metastasis                                        | 19  |
|                                  | Primary                                           | 9   |
|                                  | Recurrence                                        | 39  |
| Smoking status                   | Non-smoking                                       | 113 |
|                                  | Smoking                                           | 381 |
| Radiation therapy                | Non-radiation                                     | 63  |
|                                  | Radiation                                         | 121 |
| History of neoadjuvant treatment | Neoadjuvant                                       | 10  |
|                                  | No neoadjuvant                                    | 494 |
| Therapy                          | Chemotherapy                                      | 159 |
|                                  | Chemotherapy: Immunotherapy                       | 3   |
|                                  | Chemotherapy: Other.                              | 1   |
|                                  | Chemotherapy: Targeted Molecular therapy          | 7   |
|                                  | Chemotherapy: Targeted Molecular therapy: Vaccine | 1   |
|                                  | Immunotherapy                                     | 2   |
